# Supplementary material
Source: ML conference proceedings conference paper supplement (https://openreview.net/forum?id=9gkrbrFzZj)
Supplement: supplementary_material [file attachment]

## 467 A Installation and Data Preparation

### 468 A.1 Installation

469 In our GitHub ([github.com/chengtan9907/OpenSTL](https://github.com/chengtan9907/OpenSTL)), we have provided a conda environment setup  
470 file for OpenSTL. Users can easily reproduce the environment by executing the following commands:

```
471 git clone https://github.com/chengtan9907/OpenSTL
472 cd OpenSTL
473 conda env create -f environment.yml
474 conda activate OpenSTL
475 python setup.py develop \# or "pip install -e ."
476
```

478 By following the instructions above, OpenSTL will be installed in development mode, allowing any  
479 local code modifications to take effect. Alternatively, users can install it as a PyPi package using pip  
480 `install .`, but remember to reinstall it to apply any local modifications.

### 481 A.2 Data Preparation

482 It is recommended to symlink the dataset root (assuming `$USER_DATA_ROOT`) to `$OpenSTL/data`. If  
483 the folder structure of the user is different, the user needs to change the corresponding paths in config  
484 files. We provide tools to download and preprocess the datasets in `OpenSTL/tool/prepare_data`.

## 485 B Codebase Overview

486 In this section, we present a comprehensive overview of the codebase structure of OpenSTL. The  
487 codebase is organized into three abstracted layers, namely the core layer, algorithm layer, and user  
488 interface layer, arranged from the bottom to the top, as illustrated in Figure 4.

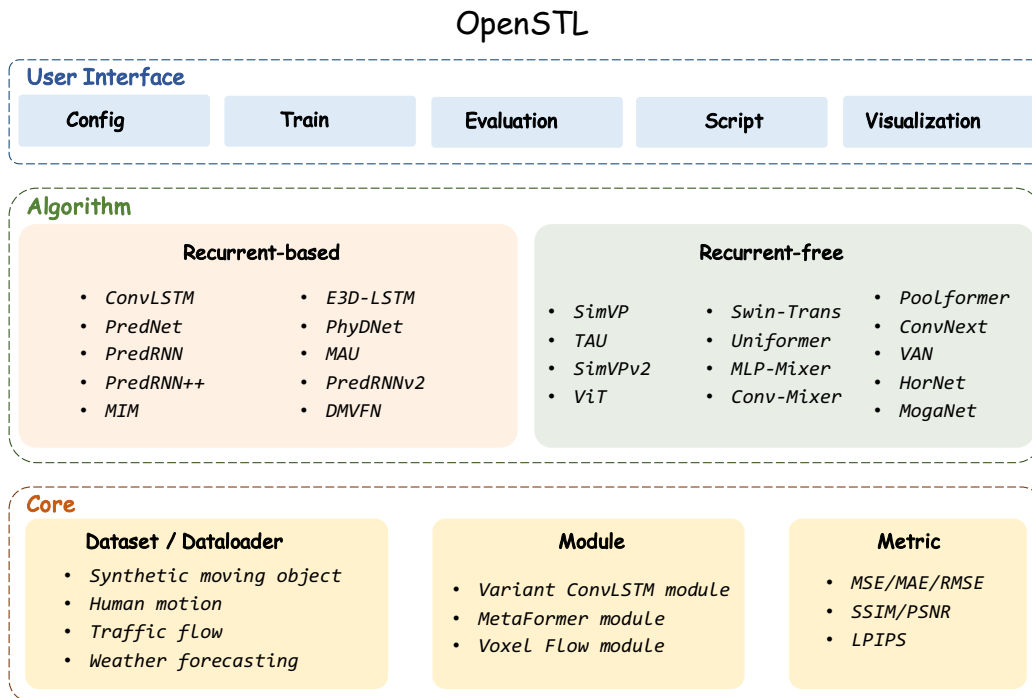

Figure 4: The graphical overview of OpenSTL.

**Core Layer** The core layer comprises essential components of OpenSTL, such as dataloaders for supported datasets, basic modules for supported models, and metrics for evaluation. The dataloaders offer a unified interface for data loading and preprocessing. The modules consist of foundational unit implementations of supported models. The metrics provide a unified interface for evaluation purposes. The core layer establishes a foundation for the upper layers to ensure flexibility in usage.

**Algorithm Layer** The algorithm layer encompasses the implementations of the supported models, which are organized into two distinct categories: recurrent-based and recurrent-free models. These implementations are developed using the PyTorch framework and closely adhere to the methodologies described in the original research papers and their official open-sourced code. The algorithm layer ensures the compatibility, reliability, and reproducibility of the supported algorithms by abstracting common components and avoiding code duplication, enabling the easy and flexible implementation of customized algorithms. Moreover, the algorithm layer provides a unified interface that facilitates seamless operations such as model training, evaluation, and testing. By offering a consistent interface, the algorithm layer enhances usability and promotes ease of experimentation with the models.

**User Interface Layer** The user interface layer comprises configurations, training, evaluation, and scripts that facilitate the basic usage of OpenSTL. We offer convenient tools for generating visualizations. The user interface layer is designed to be user-friendly and intuitive, enabling users to easily train, evaluate, and test the supported algorithms. By offering detailed parameter settings in the configurations, the user interface layer provides a unified interface that enables users to reproduce the results presented in this paper, without requiring any additional efforts.

## C Implementation Details

Table 5 describes the hyper-parameters employed in the supported models across multiple datasets, namely MMNIST, KITTI, KTH, Human, TaxiBJ, Weather-S, and Weather-M. For each dataset, the hyperparameters include  $T$ ,  $T'$ ,  $\text{hid}_S$ ,  $\text{hid}_T$ ,  $N_S$ ,  $N_T$ , epoch, optimizer, drop path, and learning rate.  $T$  and  $T'$  have the same values for the MMNIST, Human, TaxiBJ, and Weather-M datasets, but differ for KITTI and KTH. The specific values of  $T$  and  $T'$  are depended on the dataset. The learning rate and drop path are chosen from a set of values, and the best result for each experiment is reported.

The parameters  $\text{hid}_S$  and  $\text{hid}_T$  correspond to the size of the hidden layers in the spatial encoder/decoder and the temporal module of the model, respectively. While these parameters exhibit minor variations across datasets, their values largely maintain consistency, underscoring the standardized model structure across diverse datasets.  $N_S$  and  $N_T$  denote the number of blocks in the spatial encoder/decoder and the temporal module, respectively. These four hyper-parameters are from recurrent-free models, we provide the detailed hyper-parameters of recurrent-based models in GitHub for theirs are various. Please refer to the link [OpenSTL/configs](#) for more details.

Table 5: Hyper-parameters of the supported models.

| Dataset        | MMNIST                                                        | KITTI | KTH | Human | TaxiBJ | Weather-S | Weather-M |
|----------------|---------------------------------------------------------------|-------|-----|-------|--------|-----------|-----------|
| $T$            | 10                                                            | 10    | 10  | 4     | 4      | 12        | 4         |
| $T'$           | 10                                                            | 1     | 20  | 4     | 4      | 12        | 4         |
| $\text{hid}_S$ | 64                                                            | 64    | 64  | 64    | 32     | 32        | 32        |
| $\text{hid}_T$ | 512                                                           | 256   | 256 | 512   | 256    | 256       | 256       |
| $N_S$          | 4                                                             | 2     | 2   | 4     | 2      | 2         | 2         |
| $N_T$          | 8                                                             | 6     | 6   | 6     | 8      | 8         | 8         |
| epoch          | 200                                                           | 100   | 100 | 50    | 50     | 50        | 50        |
| optimizer      | Adam                                                          |       |     |       |        |           |           |
| drop path      | {0.0, 0.1, 0.2}                                               |       |     |       |        |           |           |
| learning rate  | { $1e^{-2}$ , $5e^{-3}$ , $1e^{-3}$ , $5e^{-4}$ , $1e^{-4}$ } |       |     |       |        |           |           |

## 523 D Detailed Experimental Results

### 524 D.1 Synthetic Moving Object Trajectory Prediction

525 **Moving MNIST** In addition to the quantitative results provided in the main text, we also provide  
 526 a visualization example for qualitative assessment, as shown in Figure 5. For the convenience of  
 527 formatting, we arrange the frames vertically from bottom to top. It can be observed that the majority  
 528 of recurrent-based models produce high-quality predicted results, except for PredNet and DMVFN.  
 529 Recurrent-free models achieve comparable results but exhibit blurriness in the last few frames. This  
 530 phenomenon suggests that recurrent-based models excel at capturing temporal dependencies.

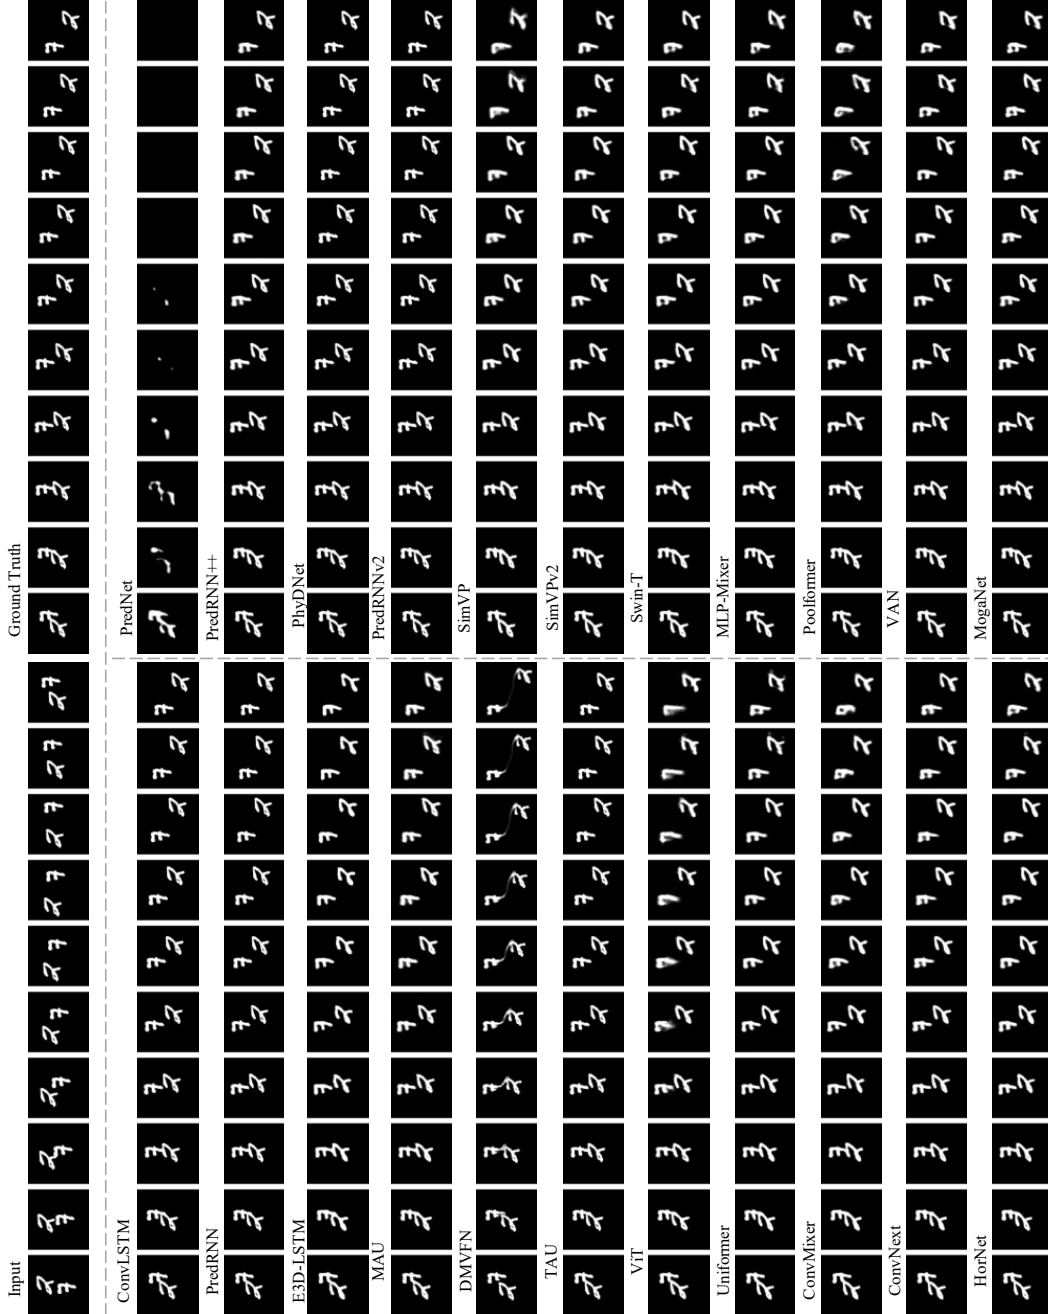

Figure 5: The qualitative visualization on Moving MNIST. For the convenience of formatting, we arrange the frames vertically from bottom to top.

531 **Moving FashionMNIST** We show the quantitative results and qualitative visualization examples in  
532 Table 6 and Figure 6, respectively. The results are consistent with those of Moving MNIST, where  
533 recurrent-based models perform well in long-range temporal modeling.

Table 6: The performance on the Moving FashionMNIST dataset.

|                 | Method           | Params (M) | FLOPs (G) | FPS  | MSE ↓        | MAE ↓        | SSIM ↑        | PSNR ↑       |
|-----------------|------------------|------------|-----------|------|--------------|--------------|---------------|--------------|
| Recurrent-based | ConvLSTM         | 15.0       | 56.8      | 113  | 28.87        | 113.20       | 0.8793        | 22.07        |
|                 | PredNet          | 12.5       | 8.4       | 659  | 185.94       | 318.30       | 0.6713        | 14.83        |
|                 | PredRNN          | 23.8       | 116.0     | 54   | 22.01        | <b>91.74</b> | 0.9091        | 23.42        |
|                 | PredRNN++        | 38.6       | 171.7     | 38   | <b>21.71</b> | 91.97        | <b>0.9097</b> | <b>23.45</b> |
|                 | MIM              | 38.0       | 179.2     | 37   | 23.09        | 96.37        | 0.9043        | 23.13        |
|                 | E3D-LSTM         | 51.0       | 298.9     | 18   | 35.35        | 110.09       | 0.8722        | 21.27        |
|                 | PhyDNet          | 3.1        | 15.3      | 182  | 34.75        | 125.66       | 0.8567        | 22.03        |
|                 | MAU              | 4.5        | 17.8      | 201  | 26.56        | 104.39       | 0.8916        | 22.51        |
|                 | PredRNNv2        | 23.9       | 116.6     | 52   | 24.13        | 97.46        | 0.9004        | 22.96        |
|                 | DMVFN            | 3.5        | 0.2       | 1145 | 118.32       | 220.02       | 0.7572        | 16.76        |
| Recurrent-free  | SimVP            | 58.0       | 19.4      | 209  | 30.77        | 113.94       | 0.8740        | 21.81        |
|                 | TAU              | 44.7       | 16.0      | 283  | 24.24        | 96.72        | 0.8995        | 22.87        |
|                 | SimVPv2          | 46.8       | 16.5      | 282  | 25.86        | 101.22       | 0.8933        | 22.61        |
|                 | ViT              | 46.1       | 16.9      | 290  | 31.05        | 115.59       | 0.8712        | 21.83        |
|                 | Swin Transformer | 46.1       | 16.4      | 294  | 28.66        | 108.93       | 0.8815        | 22.08        |
|                 | Uniformer        | 44.8       | 16.5      | 296  | 29.56        | 111.72       | 0.8779        | 21.97        |
|                 | MLP-Mixer        | 38.2       | 14.7      | 334  | 28.83        | 109.51       | 0.8803        | 22.01        |
|                 | ConvMixer        | 3.9        | 5.5       | 658  | 31.21        | 115.74       | 0.8709        | 21.71        |
|                 | Poolformer       | 37.1       | 14.1      | 341  | 30.02        | 113.07       | 0.8750        | 21.95        |
|                 | ConvNext         | 37.3       | 14.1      | 344  | 26.41        | 102.56       | 0.8908        | 22.49        |
|                 | VAN              | 44.5       | 16.0      | 288  | 31.39        | 116.28       | 0.8703        | 22.82        |
|                 | HorNet           | 45.7       | 16.3      | 287  | 29.19        | 110.17       | 0.8796        | 22.03        |
|                 | MogaNet          | 46.8       | 16.5      | 255  | 25.14        | 99.69        | 0.8960        | 22.73        |

534 **Moving MNIST-CIFAR** The quantitative results are presented in Table 7, while the qualitative  
535 visualizations are depicted in Figure 7. As the task involves more complex backgrounds, the models  
536 are required to pay greater attention to spatial modeling. Consequently, the gap between recurrent-  
537 based and recurrent-free models is narrowed.

Table 7: The performance on the Moving MNIST-CIFAR dataset.

|                 | Method           | Params (M) | FLOPs (G) | FPS  | MSE ↓        | MAE ↓         | SSIM ↑        | PSNR ↑       |
|-----------------|------------------|------------|-----------|------|--------------|---------------|---------------|--------------|
| Recurrent-based | ConvLSTM         | 15.0       | 56.8      | 113  | 73.31        | 338.56        | 0.9204        | 23.09        |
|                 | PredNet          | 12.5       | 8.4       | 659  | 286.70       | 514.14        | 0.8139        | 17.49        |
|                 | PredRNN          | 23.8       | 116.0     | 54   | 50.09        | 225.04        | 0.9499        | 24.90        |
|                 | PredRNN++        | 38.6       | 171.7     | 38   | <b>44.19</b> | 198.27        | <b>0.9567</b> | <b>25.60</b> |
|                 | MIM              | 38.0       | 179.2     | 37   | 48.63        | 213.44        | 0.9521        | 25.08        |
|                 | E3D-LSTM         | 51.0       | 298.9     | 18   | 80.79        | 214.86        | 0.9314        | 22.89        |
|                 | PhyDNet          | 3.1        | 15.3      | 182  | 142.54       | 700.37        | 0.8276        | 19.92        |
|                 | MAU              | 4.5        | 17.8      | 201  | 58.84        | 255.76        | 0.9408        | 24.19        |
|                 | PredRNNv2        | 23.9       | 116.6     | 52   | 57.27        | 252.29        | 0.9419        | 24.24        |
|                 | DMVFN            | 3.5        | 0.2       | 1145 | 298.73       | 606.92        | 0.7765        | 17.07        |
| Recurrent-free  | SimVP            | 58.0       | 19.4      | 209  | 59.83        | 214.54        | 0.9414        | 24.15        |
|                 | TAU              | 44.7       | 16.0      | 283  | 48.17        | <b>177.35</b> | 0.9539        | 25.21        |
|                 | SimVPv2          | 46.8       | 16.5      | 282  | 51.13        | 185.13        | 0.9512        | 24.93        |
|                 | ViT              | 46.1       | 16.9      | 290  | 64.94        | 234.01        | 0.9354        | 23.90        |
|                 | Swin Transformer | 46.1       | 16.4      | 294  | 57.11        | 207.45        | 0.9443        | 24.34        |
|                 | Uniformer        | 44.8       | 16.5      | 296  | 56.96        | 207.51        | 0.9442        | 24.38        |
|                 | MLP-Mixer        | 38.2       | 14.7      | 334  | 57.03        | 206.46        | 0.9446        | 24.34        |
|                 | ConvMixer        | 3.9        | 5.5       | 658  | 59.29        | 219.76        | 0.9403        | 24.17        |
|                 | Poolformer       | 37.1       | 14.1      | 341  | 60.98        | 219.50        | 0.9399        | 24.16        |
|                 | ConvNext         | 37.3       | 14.1      | 344  | 51.39        | 187.17        | 0.9503        | 24.89        |
|                 | VAN              | 44.5       | 16.0      | 288  | 59.59        | 221.32        | 0.9398        | 25.20        |
|                 | HorNet           | 45.7       | 16.3      | 287  | 55.79        | 202.73        | 0.9456        | 24.49        |
|                 | MogaNet          | 46.8       | 16.5      | 255  | 49.48        | 184.11        | 0.9521        | 25.07        |



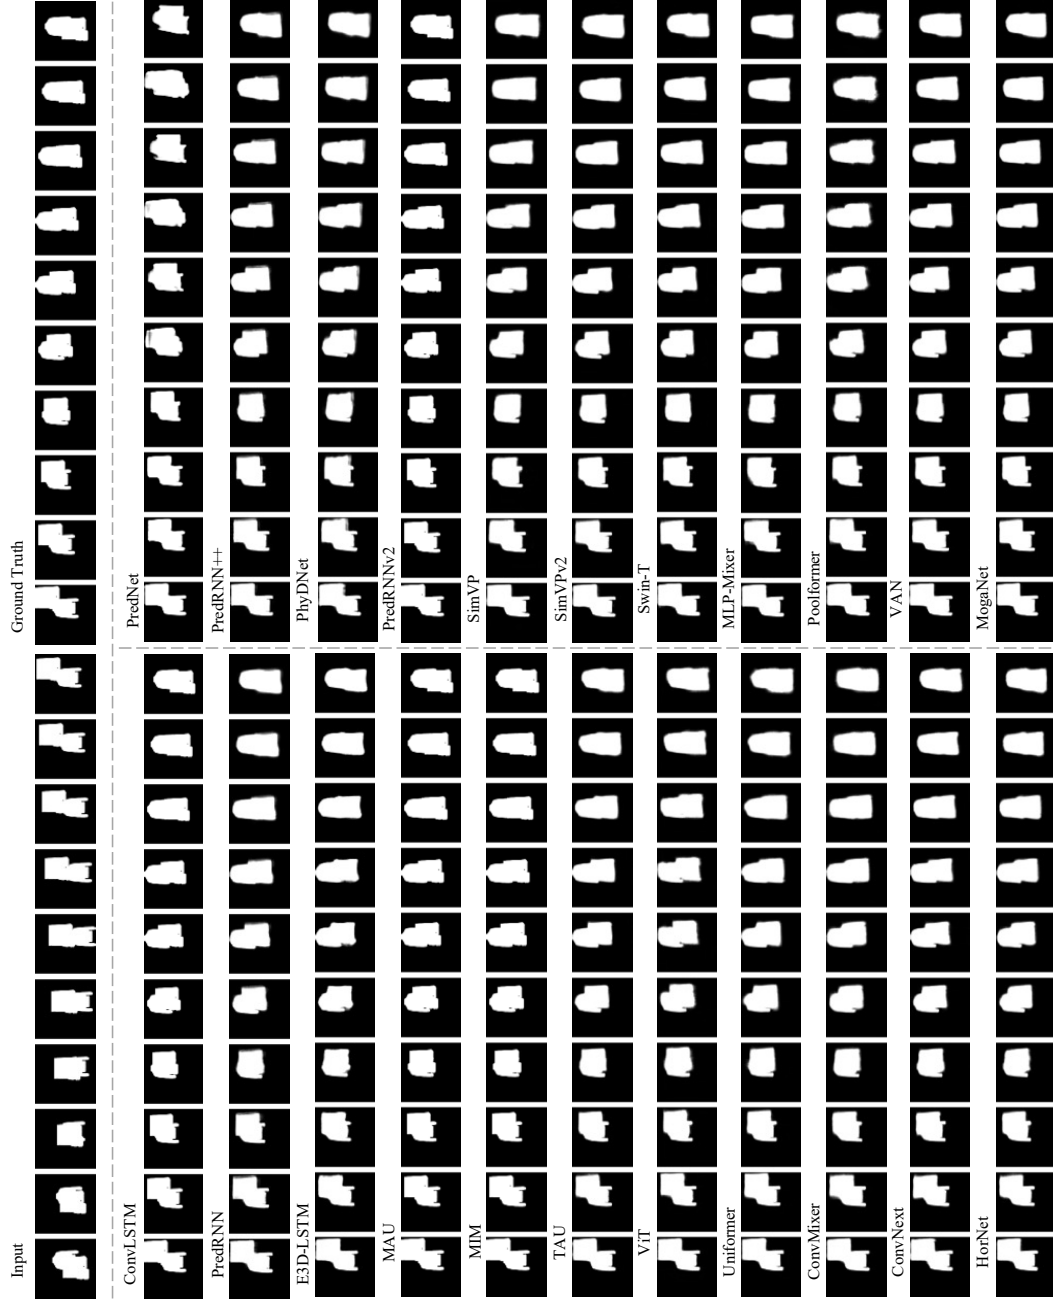

Figure 6: The qualitative visualization on Moving Fashion MNIST. For the convenience of formatting, we arrange the frames vertically from bottom to top.

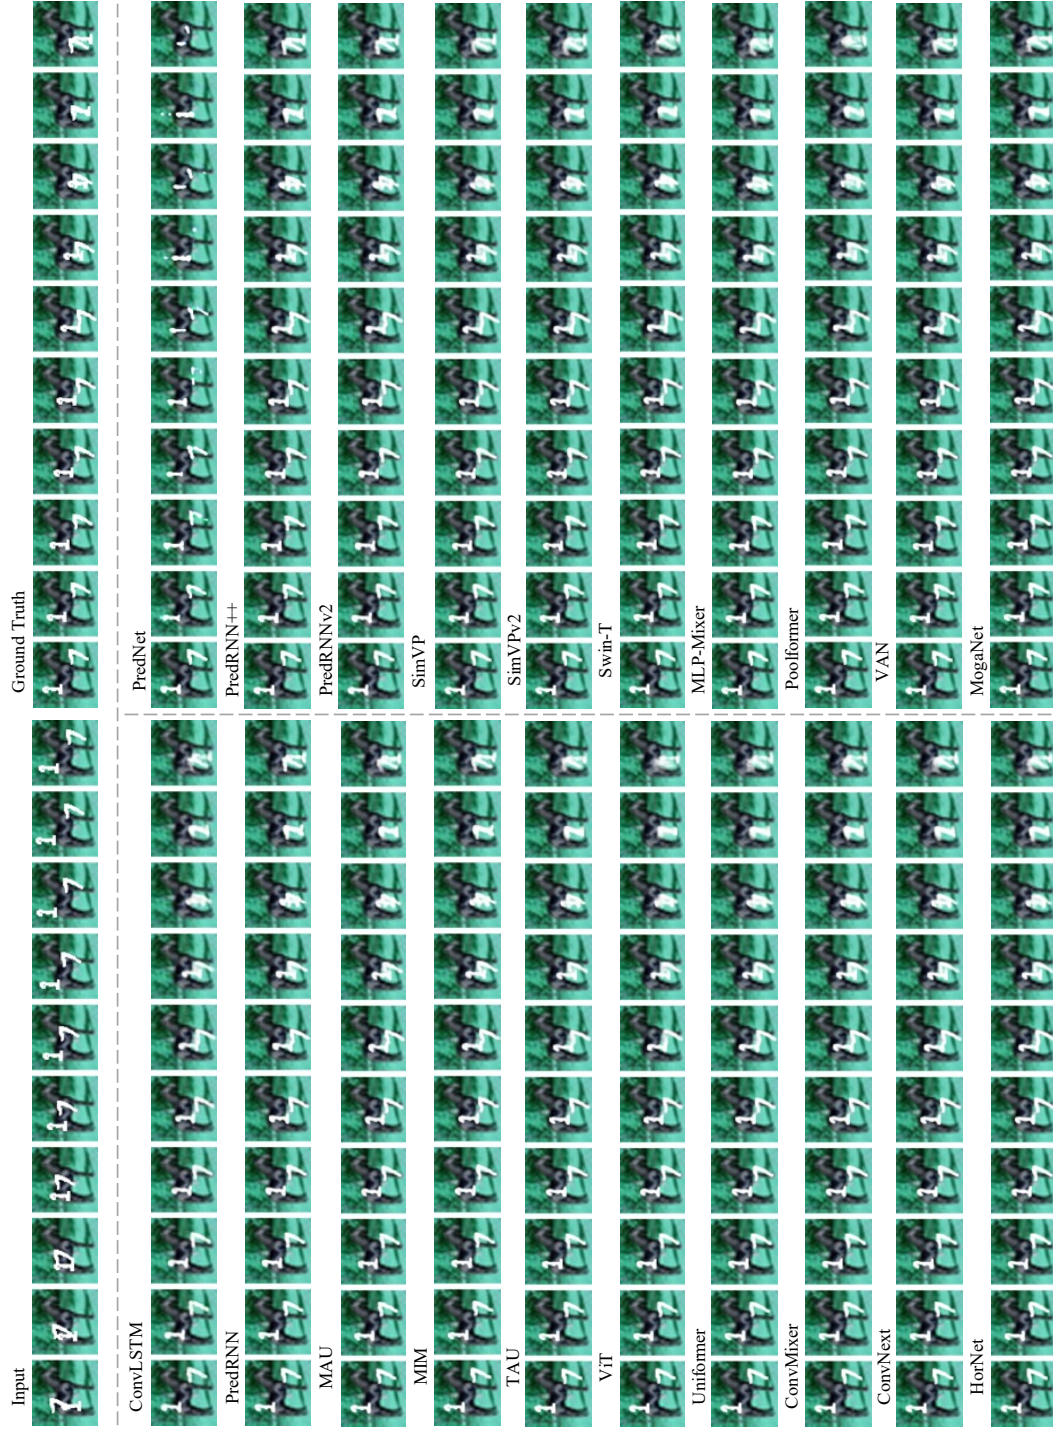

Figure 7: The qualitative visualization on Moving MNIST-CIFAR. For the convenience of formatting, we arrange the frames vertically from bottom to top.

## D.2 Real-world Video Prediction

**Kitties&Caltech** In addition to the quantitative results presented in the main text, we also provide a visualization example for qualitative assessment, as depicted in Figure 8. Interestingly, even though PredNet and DMVFN, which have limited temporal modeling capabilities, can still perform reasonably well in predicting the next frame.

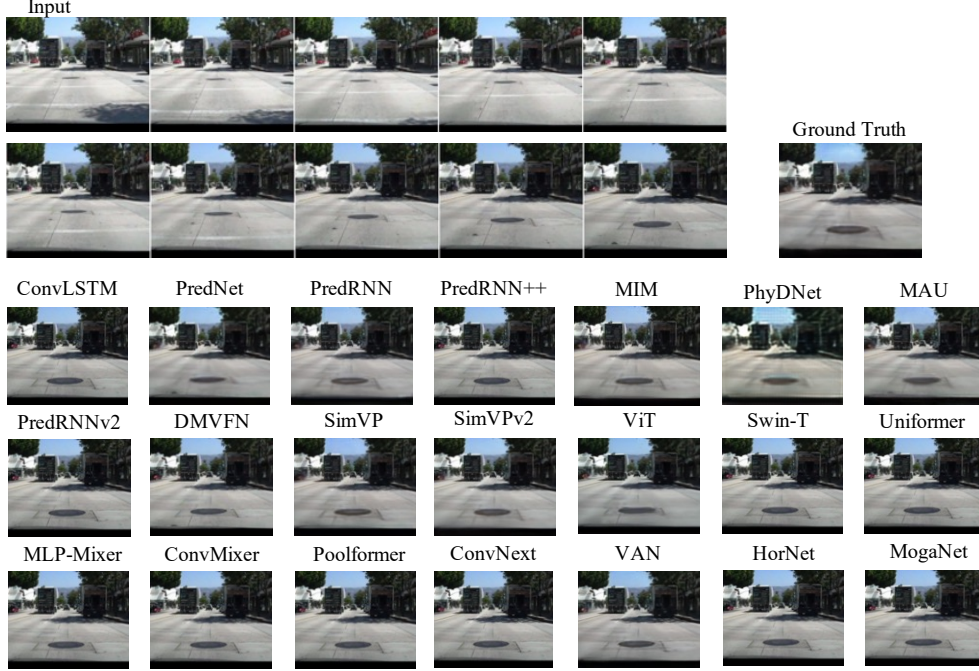

Figure 8: The qualitative visualization on Kitties&Caltech.

**KTH** We showcase the quantitative results and qualitative visualization on KTH in Table 8 and Figure 9, respectively. Recurrent-free models demonstrate comparable performance while requiring few computational costs, thus striking a favorable balance between performance and efficiency.

Table 8: The performance on the KTH dataset.

|                 | Method     | Params (M) | FLOPs (G) | FPS | MSE ↓        | MAE ↓         | SSIM ↑        | PSNR ↑       | LPIPS ↓        |
|-----------------|------------|------------|-----------|-----|--------------|---------------|---------------|--------------|----------------|
| Recurrent-based | ConvLSTM   | 14.9       | 1368.0    | 16  | 47.65        | 445.50        | 0.8977        | 26.99        | 0.26686        |
|                 | PredNet    | 12.5       | 3.4       | 399 | 152.11       | 783.10        | 0.8094        | 22.45        | 0.32159        |
|                 | PredRNN    | 23.6       | 2800.0    | 7   | 41.07        | 380.60        | 0.9097        | 27.95        | 0.21892        |
|                 | PredRNN++  | 38.3       | 4162.0    | 5   | <b>39.84</b> | <b>370.40</b> | <b>0.9124</b> | <b>28.13</b> | 0.19871        |
|                 | MIM        | 39.8       | 1099.0    | 17  | 40.73        | 380.80        | 0.9025        | 27.78        | 0.18808        |
|                 | E3D-LSTM   | 53.5       | 217.0     | 17  | 136.40       | 892.70        | 0.8153        | 21.78        | 0.48358        |
|                 | PhyDNet    | 3.1        | 93.6      | 58  | 91.12        | 765.60        | 0.8322        | 23.41        | 0.50155        |
|                 | MAU        | 20.1       | 399.0     | 8   | 51.02        | 471.20        | 0.8945        | 26.73        | 0.25442        |
|                 | PredRNNv2  | 23.6       | 2815.0    | 7   | 45.84        | 420.8         | 0.9039        | 27.33        | 0.23236        |
|                 | DMVFN      | 3.5        | 0.9       | 727 | 59.61        | 413.20        | 0.8976        | 26.65        | <b>0.12842</b> |
| Recurrent-free  | SimVP      | 12.2       | 62.8      | 77  | 41.11        | 397.10        | 0.9065        | 27.46        | 0.26496        |
|                 | TAU        | 15.0       | 73.8      | 55  | 45.32        | 421.70        | 0.9086        | 27.10        | 0.22856        |
|                 | SimVPv2    | 15.6       | 76.8      | 53  | 45.02        | 417.80        | 0.9049        | 27.04        | 0.25240        |
|                 | ViT        | 12.7       | 112.0     | 28  | 56.57        | 459.30        | 0.8947        | 26.19        | 0.27494        |
|                 | Swin-T     | 15.3       | 75.9      | 65  | 45.72        | 405.70        | 0.9039        | 27.01        | 0.25178        |
|                 | Uniformer  | 11.8       | 78.3      | 43  | 44.71        | 404.60        | 0.9058        | 27.16        | 0.24174        |
|                 | MLP-Mixer  | 20.3       | 66.6      | 34  | 59.55        | 510.4         | 0.8863        | 25.59        | 0.2815         |
|                 | ConvMixer  | 1.5        | 18.3      | 175 | 47.31        | 446.10        | 0.8993        | 26.66        | 0.28149        |
|                 | Poolformer | 12.4       | 63.6      | 67  | 45.44        | 400.90        | 0.9065        | 27.22        | 0.24763        |
|                 | ConvNext   | 12.5       | 63.9      | 72  | 45.48        | 428.30        | 0.9037        | 26.96        | 0.26253        |
|                 | VAN        | 14.9       | 73.8      | 55  | 45.05        | 409.10        | 0.9074        | 27.07        | 0.23116        |
|                 | HorNet     | 15.3       | 75.3      | 58  | 46.84        | 421.20        | 0.9005        | 26.80        | 0.26921        |
|                 | MogaNet    | 15.6       | 76.7      | 48  | 42.98        | 418.70        | 0.9065        | 27.16        | 0.25146        |

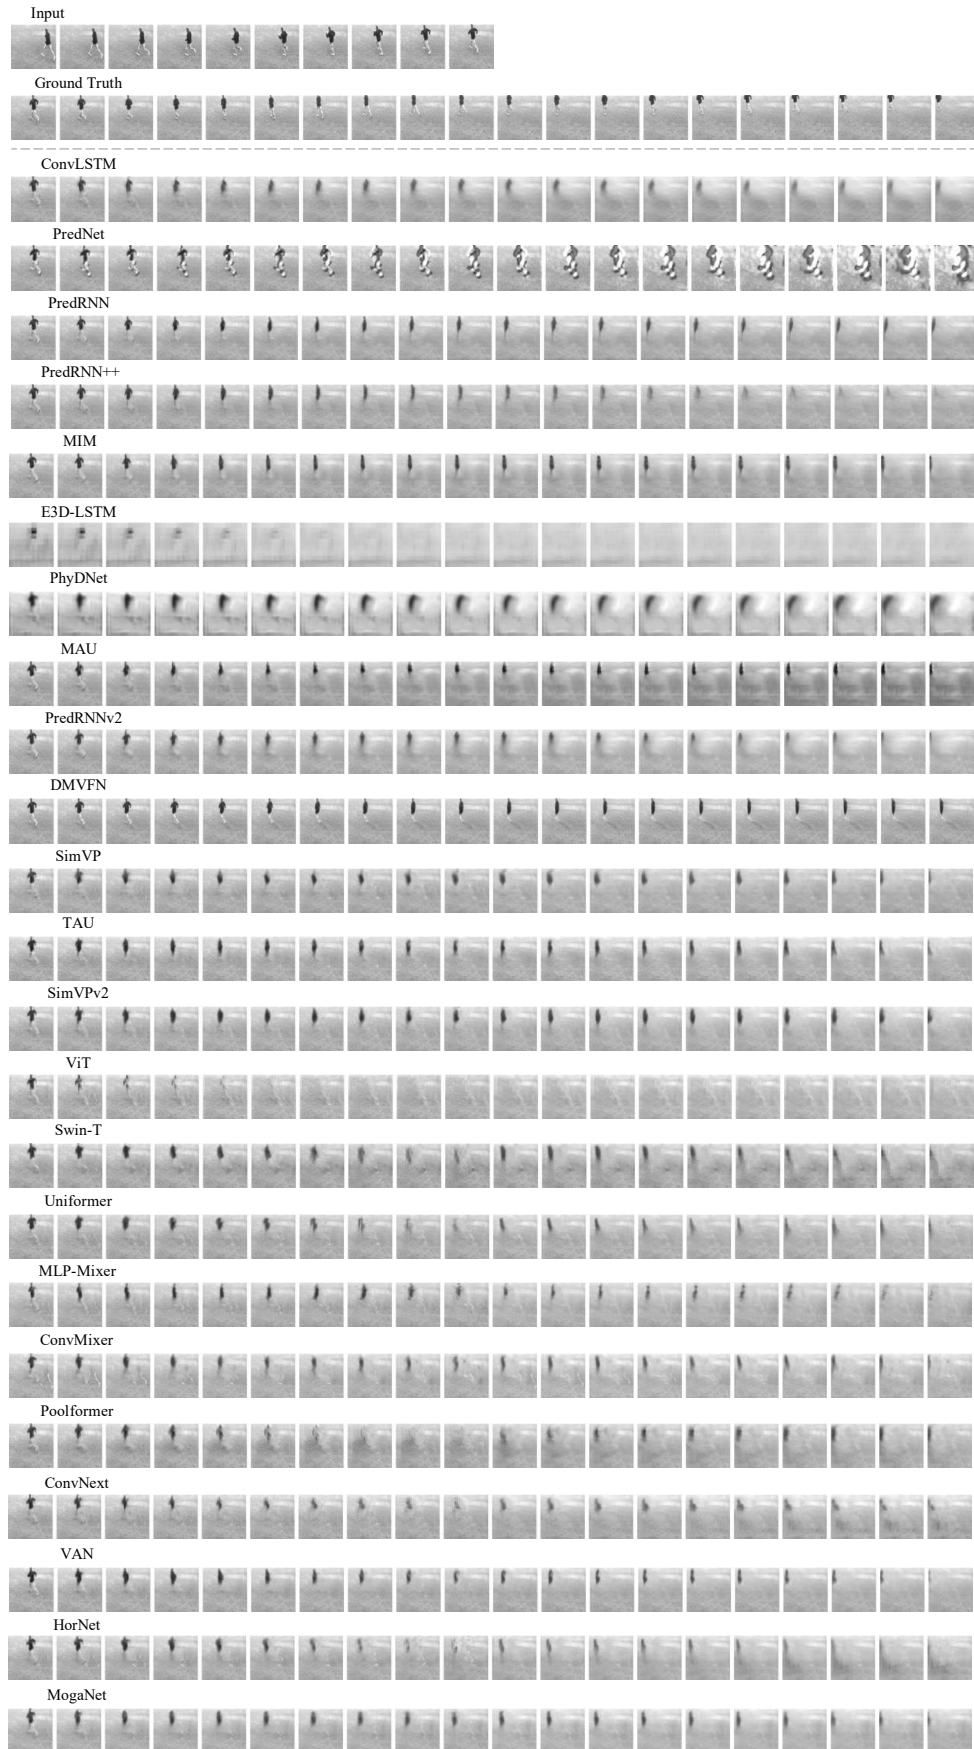

Figure 9: The qualitative visualization on KTH.



546 **Human3.6M** The quantitative results are presented in Table 9, and the qualitative visualization is  
547 depicted in Figure 10. In this task, human motion exhibits subtle changes between adjacent frames,  
548 resulting in a low-frequency signal of overall dynamics. Consequently, recurrent-free models, which  
549 excel at spatial learning, can efficiently and accurately predict future frames.

Table 9: The performance on the Human3.6M dataset.

|                 | Method    | Params (M) | FLOPs (G) | FPS | MSE ↓ | MAE ↓         | SSIM ↑        | PSNR ↑       | LPIPS ↓        |
|-----------------|-----------|------------|-----------|-----|-------|---------------|---------------|--------------|----------------|
| Recurrent-based | ConvLSTM  | 15.5       | 347.0     | 8   | 125.5 | 1566.7        | 0.9813        | 33.40        | 0.03557        |
|                 | PredRNN   | 24.6       | 704.0     | 4   | 113.2 | 1458.3        | 0.9831        | 33.94        | 0.03245        |
|                 | PredRNN++ | 39.3       | 1033.0    | 2   | 110.0 | 1452.2        | 0.9832        | 34.02        | 0.03196        |
|                 | MIM       | 47.6       | 1051.0    | 9   | 112.1 | 1467.1        | 0.9829        | 33.97        | 0.03338        |
|                 | E3D-LSTM  | 60.9       | 542.0     | 9   | 143.3 | 1442.5        | 0.9803        | 32.52        | 0.04133        |
|                 | PredRNNv2 | 24.6       | 708.0     | 3   | 114.9 | 1484.7        | 0.9827        | 33.84        | 0.03334        |
|                 | DMVFN     | 8.6        | 63.6      | 321 | 109.3 | 1449.3        | 0.9833        | 34.05        | 0.03189        |
| Recurrent-free  | SimVP     | 41.2       | 197.0     | 38  | 115.8 | 1511.5        | 0.9822        | 33.73        | 0.03467        |
|                 | TAU       | 37.6       | 182.0     | 30  | 113.3 | <b>1390.7</b> | <b>0.9839</b> | <b>34.03</b> | <b>0.02783</b> |
|                 | SimVPv2   | 11.3       | 74.6      | 26  | 108.4 | 1441.0        | 0.9834        | <b>34.08</b> | 0.03224        |
|                 | Uniformer | 27.7       | 211.0     | 23  | 116.3 | 1497.7        | 0.9824        | 33.76        | 0.03385        |
|                 | MLP-Mixer | 47.0       | 164.0     | 18  | 125.7 | 1511.9        | 0.9819        | 33.49        | 0.03417        |
|                 | ConvMixer | 3.1        | 39.4      | 87  | 115.8 | 1527.4        | 0.9822        | 33.67        | 0.03436        |
|                 | ConvNext  | 31.4       | 157.0     | 36  | 113.4 | 1469.7        | 0.9828        | 33.86        | 0.03305        |
|                 | HorNet    | 28.1       | 143.0     | 29  | 118.1 | 1481.1        | 0.9825        | 33.73        | 0.03333        |
|                 | MogaNet   | 8.6        | 163.6     | 23  | 109.1 | 1446.4        | 0.9834        | 33.89        | 0.03243        |

### 550 D.3 Traffic and Weather Forecasting

#### 551 D.3.1 TaxiBJ

552 We show the quantitative results in Table 10 and qualitative visualizations in Figure 11. The recurrent-  
553 free models have shown promising results in low-frequency traffic flow data than their counterparts.

Table 10: The performance on the TaxiBJ dataset.

|                 | Method           | Params (M) | FLOPs (G) | FPS  | MSE ↓         | MAE ↓        | SSIM ↑        |
|-----------------|------------------|------------|-----------|------|---------------|--------------|---------------|
| Recurrent-based | ConvLSTM         | 15.0       | 20.7      | 815  | 0.3358        | 15.32        | 0.9836        |
|                 | PredNet          | 12.5       | 0.9       | 5031 | 0.3516        | 15.91        | 0.9828        |
|                 | PredRNN          | 23.7       | 42.4      | 416  | 0.3194        | 15.31        | 0.9838        |
|                 | PredRNN++        | 38.4       | 63.0      | 301  | 0.3348        | 15.37        | 0.9834        |
|                 | MIM              | 37.9       | 64.1      | 275  | 0.3110        | 14.96        | 0.9847        |
|                 | E3DLSTM          | 51.0       | 98.19     | 60   | 0.3421        | 14.98        | 0.9842        |
|                 | PhyDNet          | 3.1        | 5.6       | 982  | 0.3622        | 15.53        | 0.9828        |
|                 | MAU              | 4.4        | 6.0       | 540  | 0.3268        | 15.26        | 0.9834        |
|                 | PredRNNv2        | 23.7       | 42.6      | 378  | 0.3834        | 15.55        | 0.9826        |
| Recurrent-free  | DMVFN            | 3.5        | 57.1      | 4772 | 0.3517        | 15.72        | 0.9833        |
|                 | SimVP            | 13.8       | 3.6       | 533  | 0.3282        | 15.45        | 0.9835        |
|                 | TAU              | 9.6        | 2.5       | 1268 | 0.3108        | 14.93        | <b>0.9848</b> |
|                 | SimVPv2          | 10.0       | 2.6       | 1217 | 0.3246        | 15.03        | 0.9844        |
|                 | ViT              | 9.7        | 2.8       | 1301 | 0.3171        | 15.15        | 0.9841        |
|                 | Swin Transformer | 9.7        | 2.6       | 1506 | 0.3128        | 15.07        | 0.9847        |
|                 | Uniformer        | 9.5        | 2.7       | 1333 | 0.3268        | 15.16        | 0.9844        |
|                 | MLP-Mixer        | 8.2        | 2.2       | 1974 | 0.3206        | 15.37        | 0.9841        |
|                 | ConvMixer        | 0.8        | 0.2       | 4793 | 0.3634        | 15.63        | 0.9831        |
|                 | Poolformer       | 7.6        | 2.1       | 1827 | 0.3273        | 15.39        | 0.9840        |
|                 | ConvNext         | 7.8        | 2.1       | 1918 | <b>0.3106</b> | <b>14.90</b> | 0.9845        |
|                 | VAN              | 9.5        | 2.5       | 1273 | 0.3125        | 14.96        | <b>0.9848</b> |
|                 | HorNet           | 9.7        | 2.5       | 1350 | 0.3186        | 15.01        | 0.9843        |
|                 | MogaNet          | 10.0       | 2.6       | 1005 | 0.3114        | 15.06        | 0.9847        |

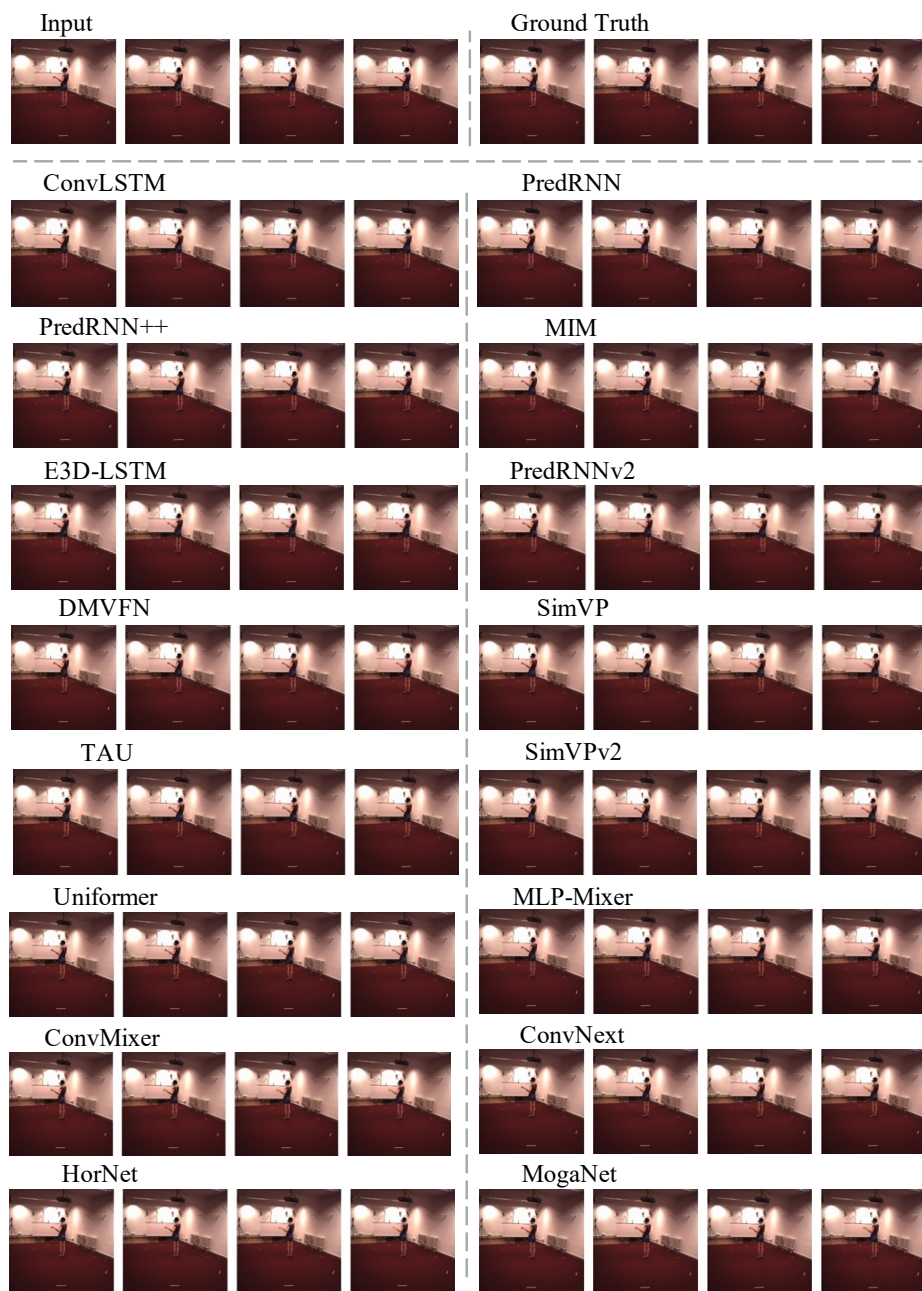

Figure 10: The qualitative visualization on Human3.6M.

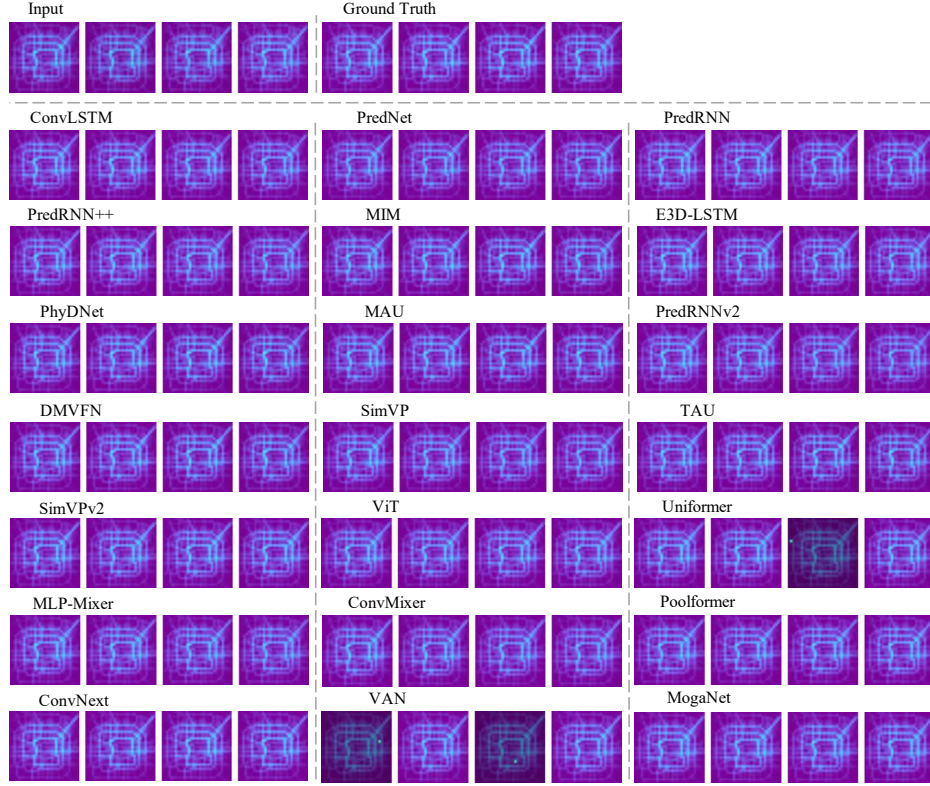

(a) InFlow of TaxBJ

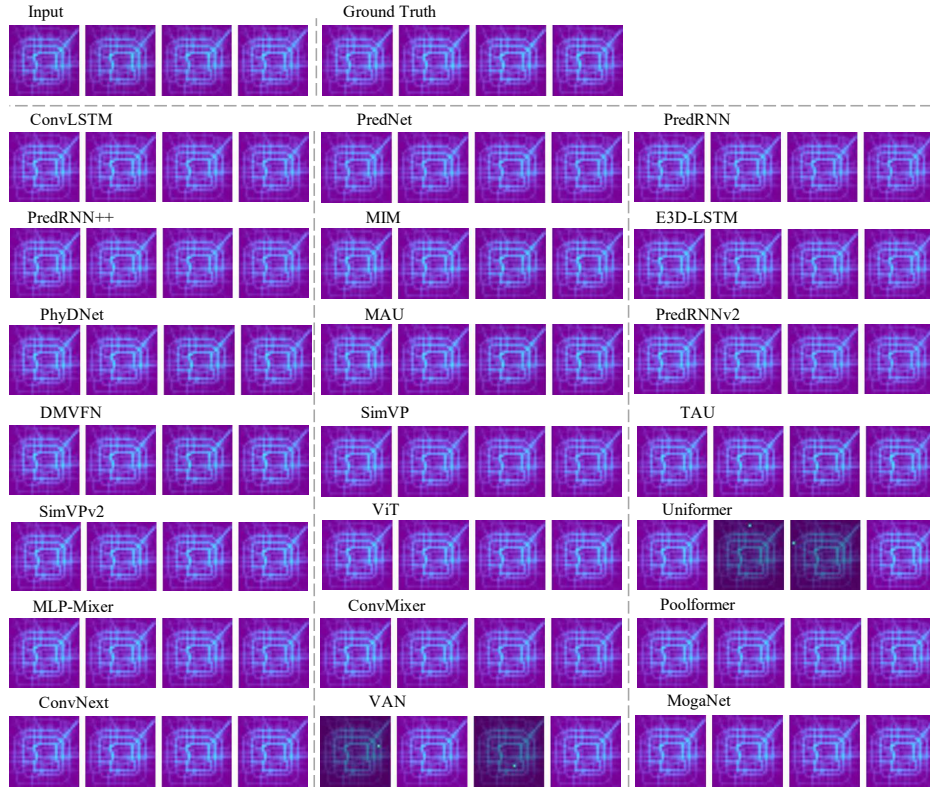

(b) OutFlow of TaxBJ

Figure 11: The qualitative visualization on TaxiBJ.



### D.3.2 WeatherBench

We strongly recommend readers refer to the GIF animations provided in our GitHub ([OpenSTL/doc-s/en/visualization/](https://github.com/OpenSTL/doc-s/en/visualization/)), as they provide a clearer visualization of the model's prediction performance.

**Single-variable Temperature Forecasting** The quantitative results and qualitative visualization are presented in Table 11 and Figure 12. The recurrent-free models exhibit a clear superiority over the recurrent-based models in terms of both performance and efficiency, achieving a landslide victory.

Table 11: The performance on the single-variable temperature forecasting in WeatherBench.

| Method          |                  | Params (M) | FLOPs (G) | FPS  | MSE ↓        | MAE ↓         | RMSE ↓       |
|-----------------|------------------|------------|-----------|------|--------------|---------------|--------------|
| Recurrent-based | ConvLSTM         | 14.9       | 136.0     | 46   | 1.521        | 0.7949        | 1.233        |
|                 | PredRNN          | 23.6       | 278.0     | 22   | 1.331        | 0.7246        | 1.154        |
|                 | PredRNN++        | 38.3       | 413.0     | 15   | 1.634        | 0.7883        | 1.278        |
|                 | MIM              | 37.8       | 109.0     | 126  | 1.784        | 0.8716        | 1.336        |
|                 | PhyDNet          | 3.1        | 36.8      | 177  | 285.9        | 8.7370        | 16.91        |
|                 | MAU              | 5.5        | 39.6      | 237  | 1.251        | 0.7036        | 1.119        |
|                 | PredRNNv2        | 23.6       | 279.0     | 22   | 1.545        | 0.7986        | 1.243        |
| Recurrent-free  | SimVP            | 14.7       | 8.0       | 160  | 1.238        | 0.7037        | 1.113        |
|                 | TAU              | 12.2       | 6.7       | 511  | 1.162        | 0.6707        | 1.078        |
|                 | SimVPv2          | 12.8       | 7.0       | 504  | <b>1.105</b> | <b>0.6567</b> | <b>1.051</b> |
|                 | ViT              | 12.4       | 8.0       | 432  | 1.146        | 0.6712        | 1.070        |
|                 | Swin Transformer | 12.4       | 6.9       | 581  | 1.143        | 0.6735        | 1.069        |
|                 | Uniformer        | 12.0       | 7.5       | 465  | 1.204        | 0.6885        | 1.097        |
|                 | MLP-Mixer        | 11.1       | 5.9       | 713  | 1.255        | 0.7011        | 1.119        |
|                 | ConvMixer        | 1.1        | 1.0       | 1705 | 1.267        | 0.7073        | 1.126        |
|                 | Poolformer       | 10.0       | 5.6       | 722  | 1.156        | 0.6715        | 1.075        |
|                 | ConvNext         | 10.1       | 5.7       | 689  | 1.277        | 0.7220        | 1.130        |
|                 | VAN              | 12.2       | 6.7       | 523  | 1.150        | 0.6803        | 1.072        |
|                 | HorNet           | 12.4       | 6.8       | 517  | 1.201        | 0.6906        | 1.096        |
|                 | MogaNet          | 12.8       | 7.0       | 416  | 1.152        | 0.6665        | 1.073        |

**Single-variable Humidity Forecasting** The quantitative results and qualitative visualization are presented in Table 12 and Figure 13. The results are almost consistent with the temperature forecasting.

Table 12: The performance on the single-variable humidity forecasting in WeatherBench.

|                 | Method           | Params (M) | FLOPs (G) | FPS  | MSE ↓         | MAE ↓        | RMSE ↓       |
|-----------------|------------------|------------|-----------|------|---------------|--------------|--------------|
| Recurrent-based | ConvLSTM         | 14.9       | 136.0     | 46   | 35.146        | 4.012        | 5.928        |
|                 | PredRNN          | 23.6       | 278.0     | 22   | 37.611        | 4.096        | 6.133        |
|                 | PredRNN++        | 38.3       | 413.0     | 15   | 45.993        | 4.731        | 6.782        |
|                 | MIM              | 37.8       | 109.0     | 126  | 61.113        | 5.504        | 7.817        |
|                 | PhyDNet          | 3.1        | 36.8      | 177  | 239.0         | 8.975        | 15.46        |
|                 | MAU              | 5.5        | 39.6      | 237  | 34.529        | 4.004        | 5.876        |
|                 | PredRNNv2        | 23.6       | 279.0     | 22   | 36.508        | 4.087        | 6.042        |
| Recurrent-free  | SimVP            | 14.7       | 8.0       | 160  | 34.355        | 3.994        | 5.861        |
|                 | TAU              | 12.2       | 6.7       | 511  | 31.831        | 3.818        | 5.642        |
|                 | SimVPv2          | 12.8       | 7.0       | 504  | 31.426        | <b>3.765</b> | 5.606        |
|                 | ViT              | 12.4       | 8.0       | 432  | 32.616        | 3.852        | 5.711        |
|                 | Swin Transformer | 12.4       | 6.9       | 581  | <b>31.332</b> | 3.776        | <b>5.597</b> |
|                 | Uniformer        | 12.0       | 7.5       | 465  | 32.199        | 3.864        | 5.674        |
|                 | MLP-Mixer        | 11.1       | 5.9       | 713  | 34.467        | 3.950        | 5.871        |
|                 | ConvMixer        | 1.1        | 1.0       | 1705 | 32.829        | 3.909        | 5.730        |
|                 | Poolformer       | 10.0       | 5.6       | 722  | 31.989        | 3.803        | 5.656        |
|                 | ConvNext         | 10.1       | 5.7       | 689  | 33.179        | 3.928        | 5.760        |
|                 | VAN              | 12.2       | 6.7       | 523  | 31.712        | 3.812        | 5.631        |
|                 | HorNet           | 12.4       | 6.8       | 517  | 32.081        | 3.826        | 5.664        |
|                 | MogaNet          | 12.8       | 7.0       | 416  | 31.795        | 3.816        | 5.639        |

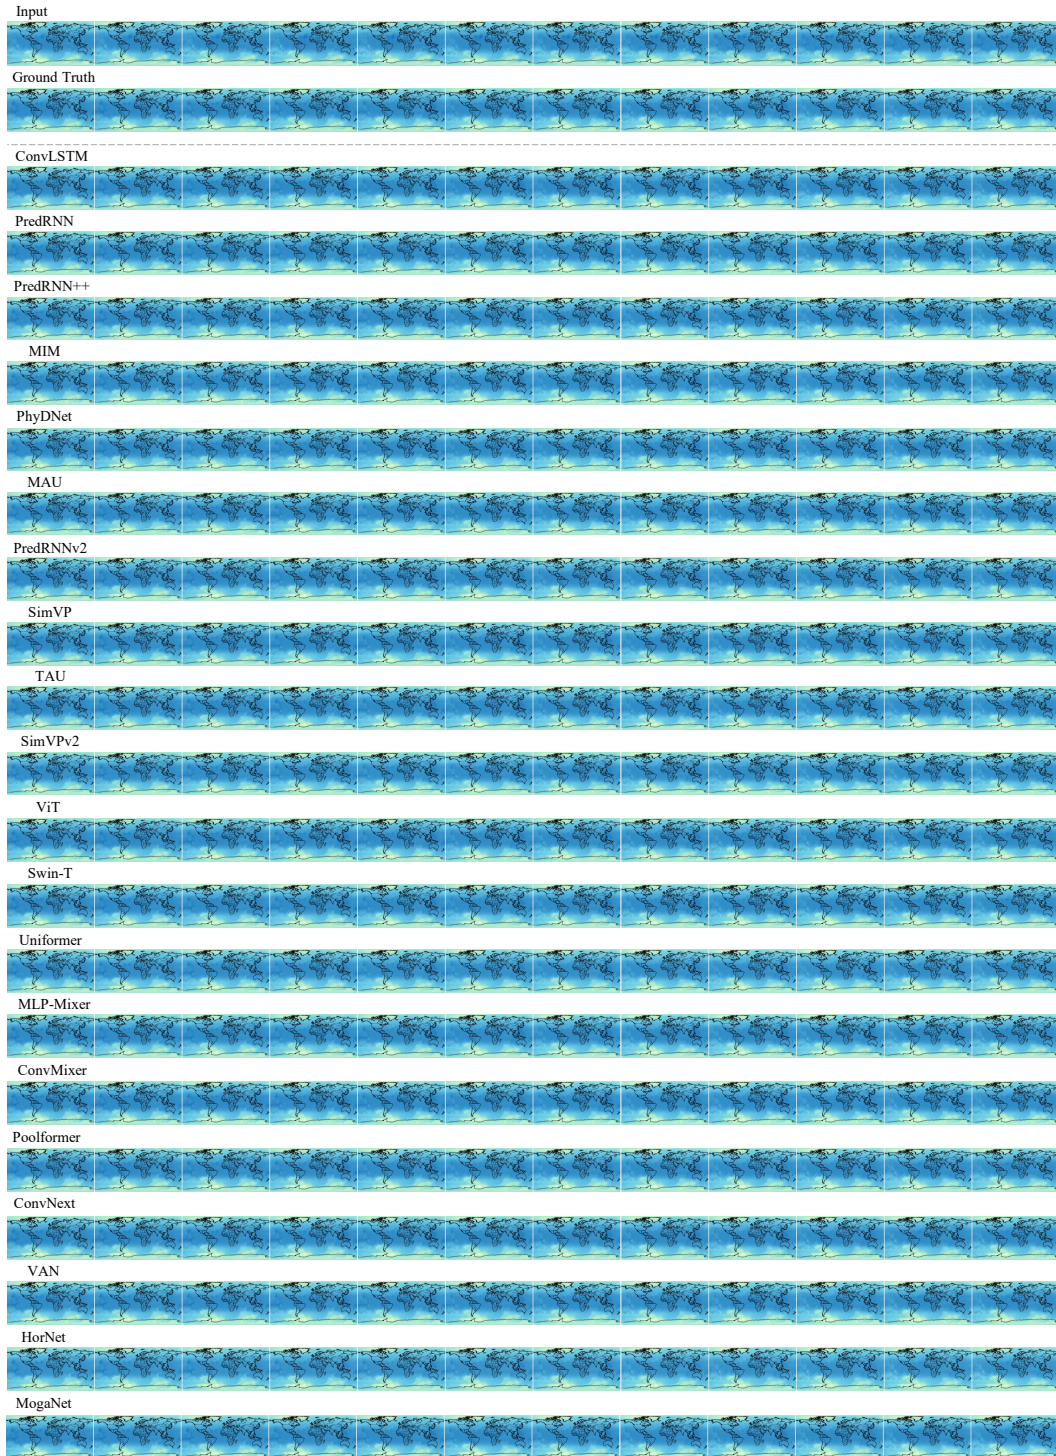

Figure 12: The qualitative visualization on the single-variable temperature forecasting in the Weather-Bench dataset.



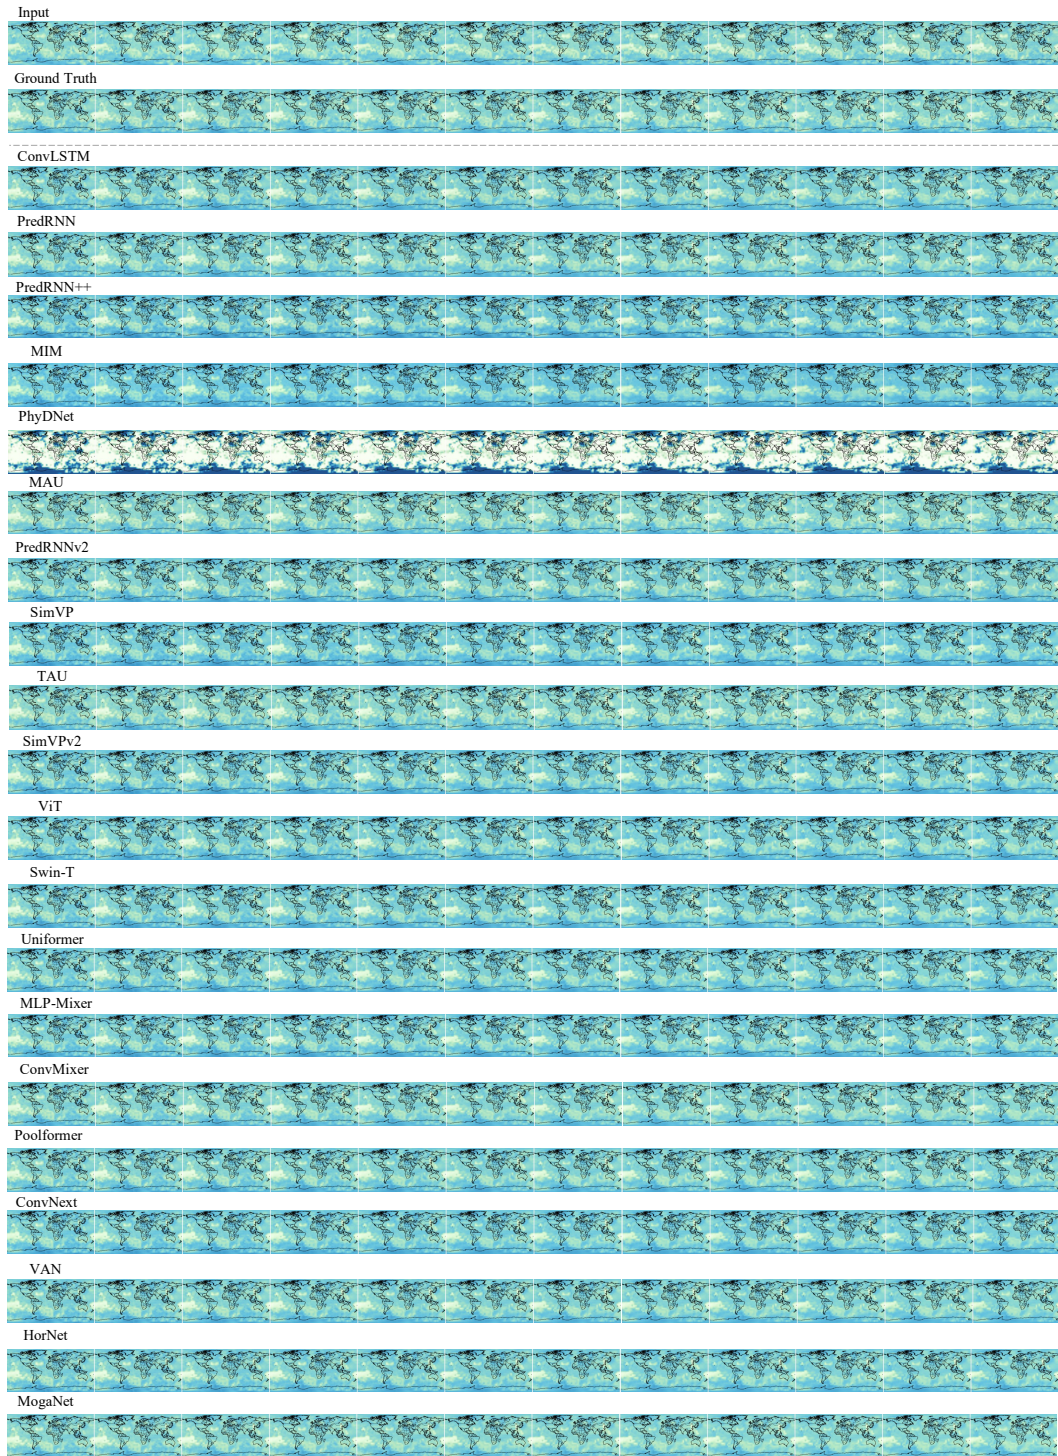

Figure 13: The qualitative visualization on the single-variable humidity forecasting in the Weather-Bench dataset.

562 **Single-variable Wind Component Forecasting** The quantitative results are presented in Table 13.  
563 The qualitative visualizations of latitude and longitude wind are shown in Figure 14 and Figure 15.  
564 Most recurrent-free models outperform the recurrent-based models.

Table 13: The performance on the single-variable wind component forecasting in WeatherBench.

|                 | Method           | Params (M) | FLOPs (G) | FPS  | MSE ↓         | MAE ↓         | RMSE ↓        |
|-----------------|------------------|------------|-----------|------|---------------|---------------|---------------|
| Recurrent-based | ConvLSTM         | 15.0       | 136.0     | 43   | 1.8976        | 0.9215        | 1.3775        |
|                 | PredRNN          | 23.7       | 279.0     | 21   | 1.8810        | 0.9068        | 1.3715        |
|                 | PredRNN++        | 38.4       | 414.0     | 14   | 1.8727        | 0.9019        | 1.3685        |
|                 | MIM              | 37.8       | 109.0     | 122  | 3.1399        | 1.1837        | 1.7720        |
|                 | PhyDNet          | 3.1        | 36.8      | 172  | 16.7983       | 2.9208        | 4.0986        |
|                 | MAU              | 5.5        | 39.6      | 233  | 1.9001        | 0.9194        | 1.3784        |
|                 | PredRNNv2        | 23.7       | 280.0     | 21   | 2.0072        | 0.9413        | 1.4168        |
| Recurrent-free  | SimVP            | 14.7       | 8.0       | 430  | 1.9993        | 0.9510        | 1.4140        |
|                 | TAU              | 12.2       | 6.7       | 505  | 1.5925        | 0.8426        | 1.2619        |
|                 | SimVPv2          | 12.8       | 7.0       | 529  | 1.5069        | 0.8142        | 1.2276        |
|                 | ViT              | 12.4       | 8.0       | 427  | 1.6262        | 0.8438        | 1.2752        |
|                 | Swin Transformer | 12.4       | 6.9       | 559  | <b>1.4996</b> | 0.8145        | <b>1.2246</b> |
|                 | Uniformer        | 12.0       | 7.5       | 466  | 1.4850        | <b>0.8085</b> | 1.2186        |
|                 | MLP-Mixer        | 11.1       | 5.9       | 687  | 1.6066        | 0.8395        | 1.2675        |
|                 | ConvMixer        | 1.1        | 1.0       | 1807 | 1.7067        | 0.8714        | 1.3064        |
|                 | Poolformer       | 10.0       | 5.6       | 746  | 1.6123        | 0.8410        | 1.2698        |
|                 | ConvNext         | 10.1       | 5.7       | 720  | 1.6914        | 0.8698        | 1.3006        |
|                 | VAN              | 12.2       | 6.7       | 549  | 1.5958        | 0.8371        | 1.2632        |
|                 | HorNet           | 12.4       | 6.9       | 539  | 1.5539        | 0.8254        | 1.2466        |
|                 | MogaNet          | 12.8       | 7.0       | 441  | 1.6072        | 0.8451        | 1.2678        |

565 **Single-variable Cloud Cover Forecasting** The quantitative results and visualization are presented in  
566 Table 14 and Figure 16. All the recurrent-free models perform better than their counterparts.

Table 14: The performance on the single-variable cloud cover forecasting in WeatherBench.

|                 | Method           | Params (M) | FLOPs (G) | FPS  | MSE ↓          | MAE ↓          | RMSE ↓       |
|-----------------|------------------|------------|-----------|------|----------------|----------------|--------------|
| Recurrent-based | ConvLSTM         | 14.9       | 136.0     | 46   | 0.04944        | 0.15419        | 0.222        |
|                 | PredRNN          | 23.6       | 278.0     | 22   | 0.05504        | 0.15877        | 0.234        |
|                 | PredRNN++        | 38.3       | 413.0     | 15   | 0.05479        | 0.15435        | 0.234        |
|                 | MIM              | 37.75      | 109.0     | 126  | 0.05997        | 0.17184        | 0.245        |
|                 | PhyDNet          | 3.1        | 36.8      | 177  | 0.09913        | 0.22614        | 0.314        |
|                 | MAU              | 5.5        | 39.6      | 237  | 0.04955        | 0.15158        | 0.222        |
|                 | PredRNNv2        | 23.6       | 279.0     | 22   | 0.05051        | 0.15867        | 0.224        |
| Recurrent-free  | SimVP            | 14.7       | 8.0       | 160  | 0.04765        | 0.15029        | 0.218        |
|                 | TAU              | 12.2       | 6.7       | 511  | 0.04723        | <b>0.14604</b> | 0.217        |
|                 | SimVPv2          | 12.8       | 7.0       | 504  | 0.04657        | 0.14688        | 0.215        |
|                 | ViT              | 12.4       | 8.0       | 432  | 0.04778        | 0.15026        | 0.218        |
|                 | Swin Transformer | 12.4       | 6.9       | 581  | <b>0.04639</b> | 0.14729        | <b>0.215</b> |
|                 | Uniformer        | 12.0       | 7.5       | 465  | 0.04680        | 0.14777        | 0.216        |
|                 | MLP-Mixer        | 11.1       | 5.9       | 713  | 0.04925        | 0.15264        | 0.221        |
|                 | ConvMixer        | 1.1        | 1.0       | 1705 | 0.04717        | 0.14874        | 0.217        |
|                 | Poolformer       | 10.0       | 5.6       | 722  | 0.04694        | 0.14884        | 0.216        |
|                 | ConvNext         | 10.1       | 5.7       | 689  | 0.04742        | 0.14867        | 0.217        |
|                 | VAN              | 12.2       | 6.7       | 523  | 0.04694        | 0.14725        | 0.216        |
|                 | HorNet           | 12.4       | 6.8       | 517  | 0.04692        | 0.14751        | 0.216        |
|                 | MogaNet          | 12.8       | 7.0       | 416  | 0.04699        | 0.14802        | 0.216        |



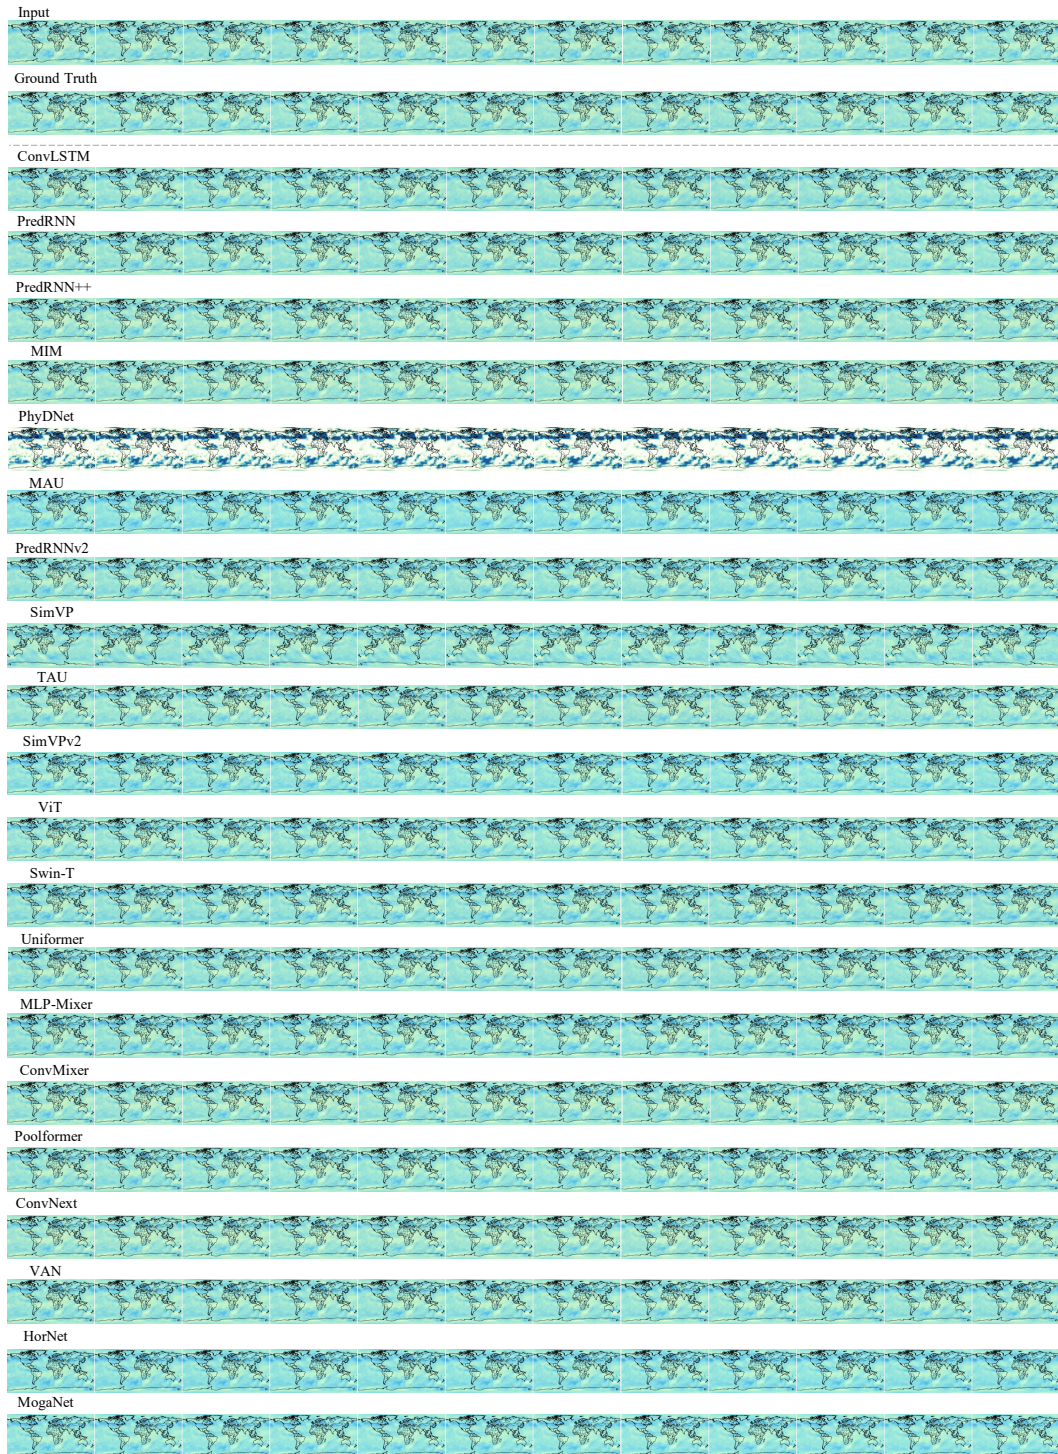

Figure 14: The qualitative visualization on the single-variable latitude wind forecasting in the WeatherBench dataset.



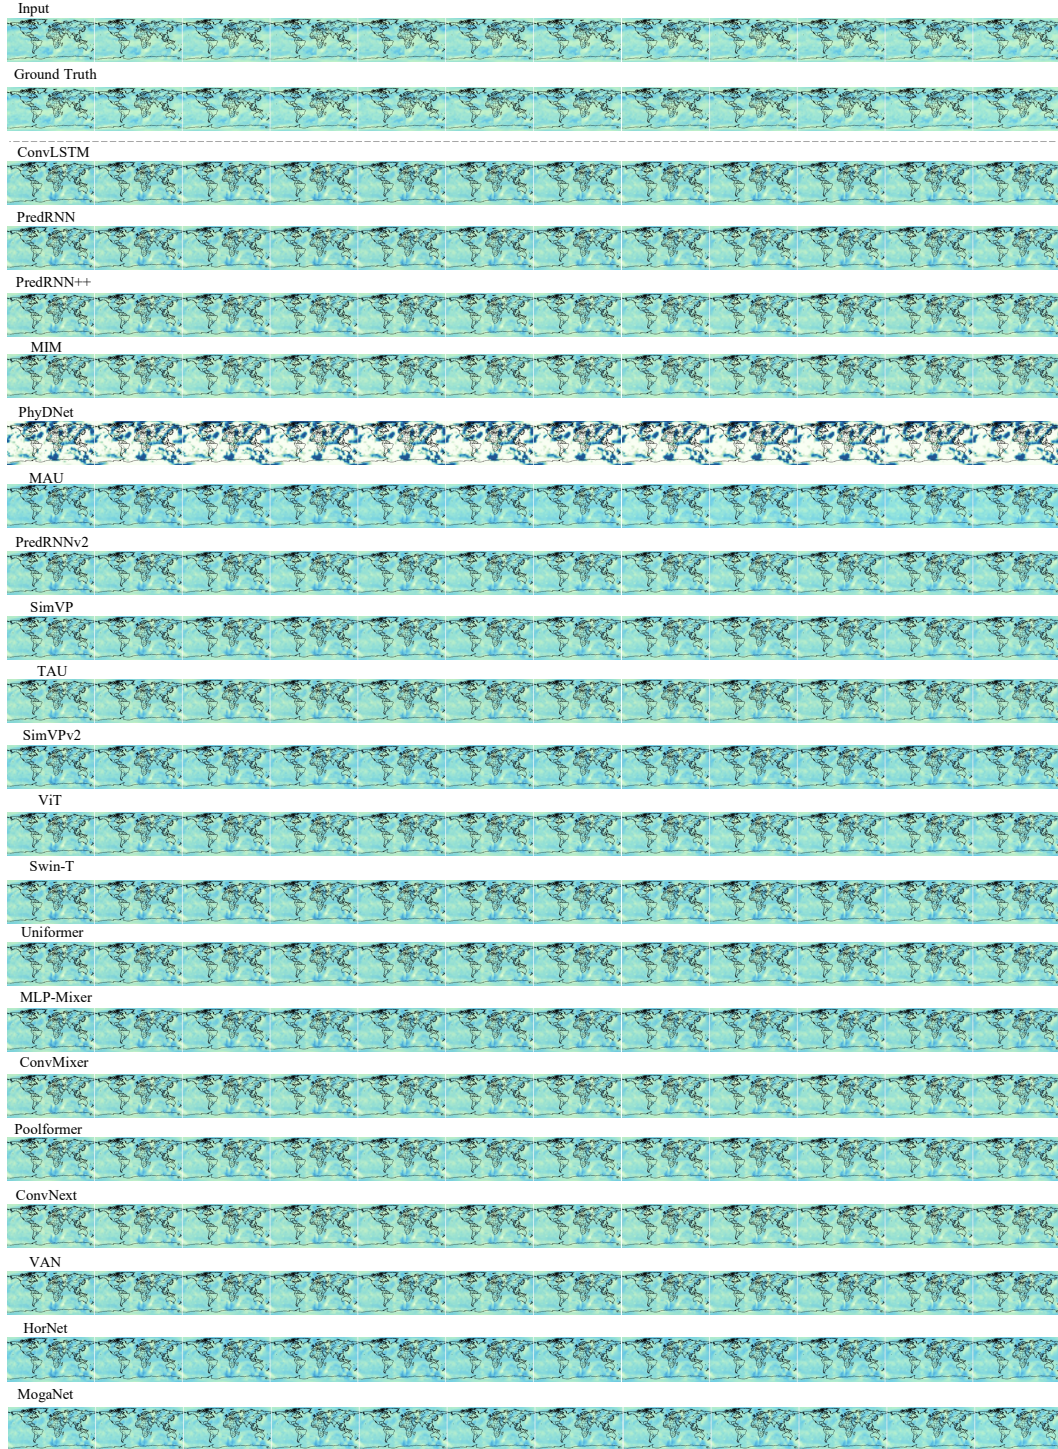

Figure 15: The qualitative visualization on the single-variable longitude wind forecasting in the WeatherBench dataset.



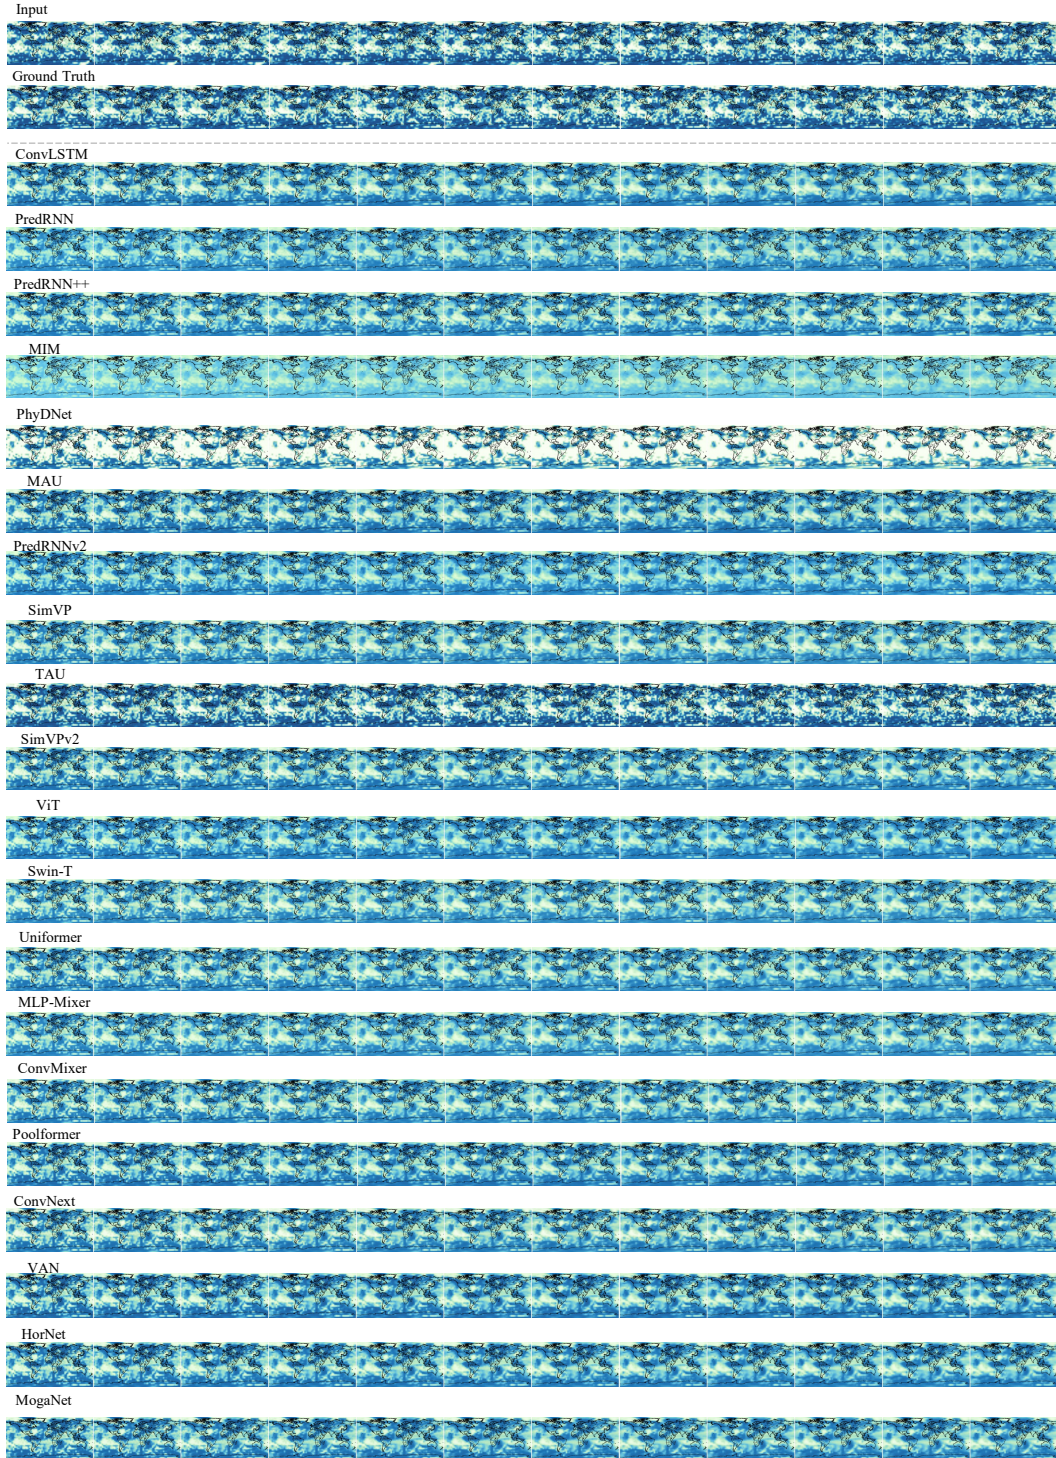

Figure 16: The qualitative visualization on the single-variable cloud cover forecasting in the Weather-Bench dataset.



567 **Single-variable Temperature Forecasting with High Resolution** We perform experiments on high-  
568 resolution ( $128 \times 256$ ) temperature forecasting. The quantitative results are presented in Table 15.  
569 SimVPv2 achieves remarkable performance, surpassing the recurrent-based models by large margins.

Table 15: The performance on the single-variable high-resolution ( $128 \times 256$ ) temperature forecasting.

| Method          | Params (M)       | FLOPs (G) | FPS    | MSE ↓ | MAE ↓         | RMSE ↓        |
|-----------------|------------------|-----------|--------|-------|---------------|---------------|
| Recurrent-based | ConvLSTM         | 15.0      | 550.0  | 35    | 1.0625        | 0.6517        |
|                 | PredRNN          | 23.8      | 1123.0 | 3     | 0.8966        | 0.5869        |
|                 | PredRNN++        | 38.6      | 1663.0 | 2     | 0.8538        | 0.5708        |
|                 | MIM              | 42.2      | 1739.0 | 11    | 1.2138        | 0.6857        |
|                 | PhyDNet          | 3.1       | 148.0  | 41    | 297.34        | 8.9788        |
|                 | MAU              | 11.8      | 172.0  | 17    | 1.0031        | 0.6316        |
|                 | PredRNNv2        | 23.9      | 1129.0 | 3     | 1.0451        | 0.6190        |
| Recurrent-free  | SimVP            | 14.7      | 128.0  | 27    | 0.8492        | 0.5636        |
|                 | TAU              | 12.3      | 36.1   | 94    | 0.8316        | 0.5615        |
|                 | SimVPv2          | 12.8      | 112.0  | 33    | <b>0.6499</b> | <b>0.4909</b> |
|                 | ViT              | 12.5      | 36.8   | 50    | 0.8969        | 0.5834        |
|                 | Swin Transformer | 12.4      | 110.0  | 38    | 0.7606        | 0.5193        |
|                 | Uniformer        | 12.1      | 48.8   | 57    | 1.0052        | 0.6294        |
|                 | MLP-Mixer        | 27.9      | 94.7   | 49    | 1.1865        | 0.6593        |
|                 | ConvMixer        | 1.1       | 15.1   | 117   | 0.8557        | 0.5669        |
|                 | Poolformer       | 10.0      | 89.7   | 42    | 0.7983        | 0.5316        |
|                 | ConvNext         | 10.1      | 90.5   | 47    | 0.8058        | 0.5406        |
|                 | VAN              | 12.2      | 107.0  | 34    | 0.7110        | 0.5094        |
|                 | HorNet           | 12.4      | 109.0  | 34    | 0.8250        | 0.5467        |
|                 | MogaNet          | 12.8      | 112.0  | 27    | 0.7517        | 0.5232        |

570 **Multiple-variable Forecasting** This task focuses on multi-factor climate prediction. We include tem-  
571 perature, humidity, latitude wind, and longitude factors in the forecasting process. The comprehensive  
572 results can be found in Table 16 to Table 19. We also show a comparison in Figure 17. MogaNet  
573 achieves significant leading performance across various metrics in predicting climatic factors.

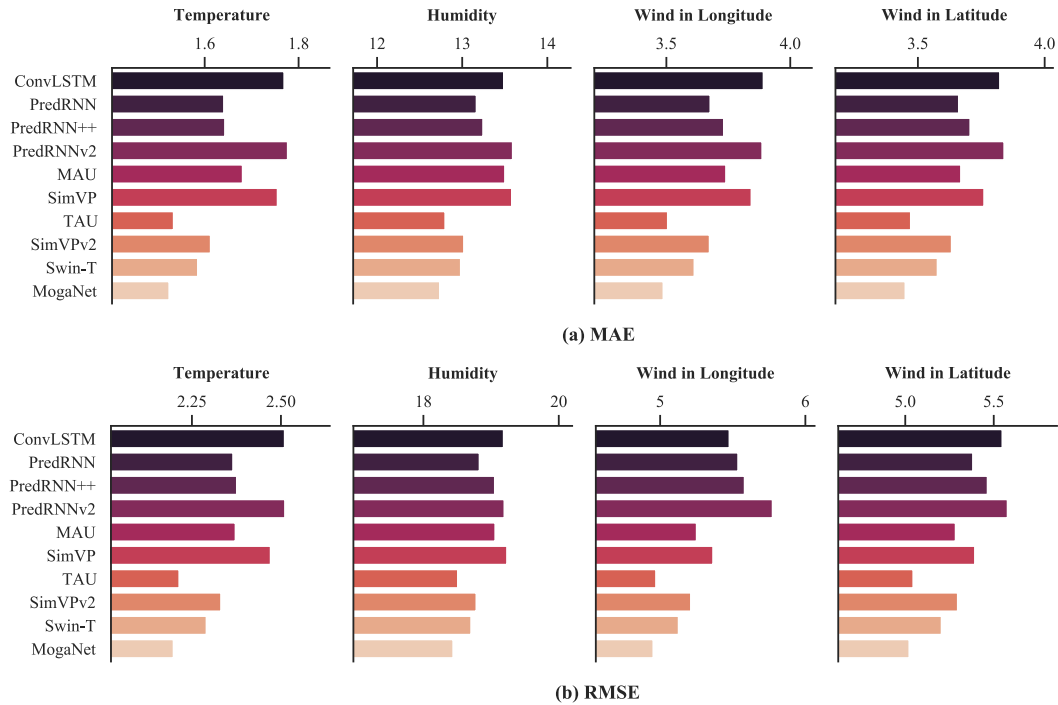

Figure 17: The (a) MAE and (b) RMSE metrics of the representative approaches on the four weather forecasting tasks in WeatherBench (Muti-variable setting).

Table 16: The performance on the multiple-variable temperature forecasting in WeatherBench.

|                 | Method           | Params (M) | FLOPs (G) | MSE ↓         | MAE ↓         | RMSE ↓        |
|-----------------|------------------|------------|-----------|---------------|---------------|---------------|
| Recurrent-based | ConvLSTM         | 15.5       | 43.3      | 6.3034        | 1.7695        | 2.5107        |
|                 | PredRNN          | 24.6       | 88.0      | 5.5966        | 1.6411        | 2.3657        |
|                 | PredRNN++        | 39.3       | 129.0     | 5.6471        | 1.6433        | 2.3763        |
|                 | MIM              | 5.5        | 12.1      | 7.5152        | 1.9650        | 2.7414        |
|                 | PhyDNet          | 3.1        | 11.3      | 95.113        | 6.4749        | 9.7526        |
|                 | MAU              | 5.5        | 12.1      | 5.6287        | 1.6810        | 2.3725        |
|                 | PredRNNv2        | 24.6       | 88.5      | 6.3078        | 1.7770        | 2.5115        |
| Recurrent-free  | SimVP            | 13.8       | 7.3       | 6.1068        | 1.7554        | 2.4712        |
|                 | TAU              | 9.6        | 5.0       | 4.9042        | 1.5341        | 2.2145        |
|                 | SimVPv2          | 10.0       | 5.3       | 5.4382        | 1.6129        | 2.3319        |
|                 | ViT              | 9.7        | 6.1       | 5.2722        | 1.6005        | 2.2961        |
|                 | Swin Transformer | 9.7        | 5.2       | 5.2486        | 1.5856        | 2.2910        |
|                 | Unifomer         | 9.5        | 5.9       | 5.1174        | 1.5758        | 2.2622        |
|                 | MLP-Mixer        | 8.7        | 4.4       | 5.8546        | 1.6948        | 2.4196        |
|                 | ConvMixer        | 0.9        | 0.5       | 6.5838        | 1.8228        | 2.5659        |
|                 | Poolformer       | 7.8        | 4.1       | 7.1077        | 1.8791        | 2.6660        |
|                 | ConvNext         | 7.9        | 4.2       | 6.1749        | 1.7448        | 2.4849        |
|                 | VAN              | 9.5        | 5.0       | 4.9396        | 1.5390        | 2.2225        |
|                 | HorNet           | 9.7        | 5.1       | 5.5856        | 1.6198        | 2.3634        |
|                 | MogaNet          | 10.0       | 5.3       | <b>4.8335</b> | <b>1.5246</b> | <b>2.1985</b> |

Table 17: The performance on the multiple-variable humidity forecasting in WeatherBench.

|                 | Method           | Params (M) | FLOPs (G) | MSE ↓         | MAE ↓         | RMSE ↓        |
|-----------------|------------------|------------|-----------|---------------|---------------|---------------|
| Recurrent-based | ConvLSTM         | 15.5       | 43.3      | 368.15        | 13.490        | 19.187        |
|                 | PredRNN          | 24.6       | 88.0      | 354.57        | 13.169        | 18.830        |
|                 | PredRNN++        | 39.3       | 129.0     | 363.15        | 13.246        | 19.056        |
|                 | MIM              | 41.7       | 35.8      | 408.24        | 14.658        | 20.205        |
|                 | PhyDNet          | 3.1        | 11.3      | 668.40        | 21.398        | 25.853        |
|                 | MAU              | 5.5        | 12.1      | 363.36        | 13.503        | 19.062        |
|                 | PredRNNv2        | 24.6       | 88.5      | 368.52        | 13.594        | 19.197        |
| Recurrent-free  | SimVP            | 13.8       | 7.3       | 370.03        | 13.584        | 19.236        |
|                 | TAU              | 9.6        | 5.0       | 342.63        | 12.801        | <b>18.510</b> |
|                 | SimVPv2          | 10.0       | 5.3       | 352.79        | 13.021        | 18.783        |
|                 | ViT              | 9.7        | 6.1       | 352.36        | 13.056        | 18.771        |
|                 | Swin Transformer | 9.7        | 5.2       | 349.92        | <b>12.984</b> | 18.706        |
|                 | Unifomer         | 9.5        | 5.9       | 351.66        | 12.994        | 18.753        |
|                 | MLP-Mixer        | 8.7        | 4.4       | 365.48        | 13.408        | 19.118        |
|                 | ConvMixer        | 0.9        | 0.5       | 381.85        | 13.917        | 19.541        |
|                 | Poolformer       | 7.8        | 4.1       | 380.18        | 13.908        | 19.498        |
|                 | ConvNext         | 7.9        | 4.2       | 367.39        | 13.516        | 19.168        |
|                 | VAN              | 9.5        | 5.0       | 343.61        | 12.790        | 18.537        |
|                 | HorNet           | 9.7        | 5.1       | 353.02        | 13.024        | 18.789        |
|                 | MogaNet          | 10.0       | 5.3       | <b>340.06</b> | 12.738        | 18.441        |

Table 18: The performance on the multiple-variable latitude wind forecasting in WeatherBench.

|                 | Method           | Params (M) | FLOPs (G) | MSE ↓         | MAE ↓         | RMSE ↓        |
|-----------------|------------------|------------|-----------|---------------|---------------|---------------|
| Recurrent-based | ConvLSTM         | 15.5       | 43.3      | 30.789        | 3.8238        | 5.5488        |
|                 | PredRNN          | 24.6       | 88.0      | 28.973        | 3.6617        | 5.3827        |
|                 | PredRNN++        | 39.3       | 129.0     | 29.872        | 3.7067        | 5.4655        |
|                 | MIM              | 41.7       | 35.8      | 36.464        | 4.2066        | 6.0386        |
|                 | PhyDNet          | 3.1        | 11.3      | 54.389        | 5.1996        | 7.3749        |
|                 | MAU              | 5.5        | 12.1      | 27.929        | 3.6700        | 5.2848        |
|                 | PredRNNv2        | 24.6       | 88.5      | 31.120        | 3.8406        | 5.5785        |
| Recurrent-free  | SimVP            | 13.8       | 7.3       | 29.094        | 3.7614        | 5.3939        |
|                 | TAU              | 9.6        | 5.0       | 25.456        | 3.4723        | 5.0454        |
|                 | SimVPv2          | 10.0       | 5.3       | 28.058        | 3.6335        | 5.2970        |
|                 | ViT              | 9.66       | 6.12      | 27.381        | 3.6068        | 5.2327        |
|                 | Swin Transformer | 9.7        | 5.2       | 27.097        | 3.5777        | 5.2055        |
|                 | Uniformer        | 9.5        | 5.9       | 26.799        | 3.5676        | 5.1768        |
|                 | MLP-Mixer        | 8.7        | 4.4       | 30.014        | 3.7840        | 5.4785        |
|                 | ConvMixer        | 0.9        | 0.5       | 31.609        | 3.9104        | 5.6222        |
|                 | Poolformer       | 7.8        | 4.1       | 35.161        | 4.0764        | 5.9296        |
|                 | ConvNext         | 7.9        | 4.2       | 31.326        | 3.8435        | 5.5969        |
|                 | VAN              | 9.5        | 5.0       | 25.720        | 3.4858        | 5.0715        |
|                 | HorNet           | 9.7        | 5.1       | 30.028        | 3.7148        | 5.4798        |
|                 | MogaNet          | 10.0       | 5.3       | <b>25.232</b> | <b>3.4509</b> | <b>5.0231</b> |

Table 19: The performance on the multiple-variable longitude wind forecasting in WeatherBench.

|                 | Method           | Params (M) | FLOPs (G) | MSE ↓         | MAE ↓         | RMSE ↓        |
|-----------------|------------------|------------|-----------|---------------|---------------|---------------|
| Recurrent-based | ConvLSTM         | 15.5       | 43.3      | 30.002        | 3.8923        | 5.4774        |
|                 | PredRNN          | 24.6       | 88.0      | 27.484        | 3.6776        | 5.2425        |
|                 | PredRNN++        | 39.3       | 129.0     | 28.396        | 3.7322        | 5.3288        |
|                 | MIM              | 41.7       | 35.8      | 35.586        | 4.2842        | 5.9654        |
|                 | PhyDNet          | 3.1        | 11.3      | 97.424        | 7.3637        | 9.8704        |
|                 | MAU              | 5.5        | 12.1      | 27.582        | 3.7409        | 5.2519        |
|                 | PredRNNv2        | 24.6       | 88.5      | 29.833        | 3.8870        | 5.4620        |
| Recurrent-free  | SimVP            | 13.8       | 7.3       | 28.782        | 3.8435        | 5.3649        |
|                 | TAU              | 9.6        | 5.0       | 24.719        | 3.5060        | 4.9719        |
|                 | SimVPv2          | 10.0       | 5.3       | 27.166        | 3.6747        | 5.2121        |
|                 | ViT              | 9.7        | 6.1       | 26.595        | 3.6472        | 5.1570        |
|                 | Swin Transformer | 9.7        | 5.2       | 26.292        | 3.6133        | 5.1276        |
|                 | Uniformer        | 9.5        | 5.9       | 25.994        | 3.6069        | 5.0985        |
|                 | MLP-Mixer        | 8.7        | 4.4       | 29.242        | 3.8407        | 5.4076        |
|                 | ConvMixer        | 0.9        | 0.5       | 30.983        | 3.9949        | 5.5662        |
|                 | Poolformer       | 7.8        | 4.1       | 33.757        | 4.1280        | 5.8101        |
|                 | ConvNext         | 7.9        | 4.2       | 29.764        | 3.8688        | 5.4556        |
|                 | VAN              | 9.5        | 5.0       | 24.991        | 3.5254        | 4.9991        |
|                 | HorNet           | 9.7        | 5.1       | 28.192        | 3.7142        | 5.3096        |
|                 | MogaNet          | 10.0       | 5.3       | <b>24.535</b> | <b>3.4882</b> | <b>4.9533</b> |
